# Supplementary material
Source: PubMed Central journal article supplement (PMC3151036)

# Supplemental data

## Legends

### **Supplementary Fig. 1**

Gene expression profile in the islets from wild type, TgRIP-SREBP-1c, and SREBP-1c null mice. The amounts of mRNA of SREBP-1c and PDX-1 in the islets were estimated using RT-PCR (22).

### **Supplementary Fig. 2**

**The protein interaction between USF-1 (or SREBP-1c) was specific and not non-specific bridging by DNA.**

*In vitro* translated proteins (IVTT) (5  $\mu$ l) and micrococcal nuclease S7 (0.1 mg/ml) (Worthington) were incubated in 0.1 M Sodium borate (pH 8.8) (10  $\mu$ l) and 0.01 M CaCl<sub>2</sub> (5  $\mu$ l) for 10 min at 37 °C. (A) S7 catalyzed endohydrolysis of the RNA and DNA in IVTT proteins. (B, C) GST or GST-PDX-1 proteins were incubated with <sup>35</sup>S-USF1 or <sup>35</sup>S-SREBP-1c proteins with or without S7 treatment for 60 min at 4 °C. Bound proteins were resolved on a 15% gel by SDS-PAGE followed by autoradiography. The experiments in (B) and (C) were repeated two times with similar results.

### **Supplementary Fig. 3**

**SREBP-1c•PDX-1 complex suppresses the activation of SREBP target genes.**

An artificial LDLR (SRE)-Luc and CMV-SREBP-1a (0.01  $\mu$ g) or an artificial S14 (E-box)-Luc and CMV-SREBP-1aM (0.25  $\mu$ g) and pSV- $\beta$ -gal were cotransfected into HepG2 cells with the indicated amounts of CMV-PDX-1, CMV- $\Delta$ ABC-PDX-1, CMV- $\Delta$ HD-PDX-1, or the empty vector (CMV-7). (A) LDLR (SRE)-Luc contains three copies of a classic SRE and Sp-1 site from the LDL receptor promoter (n = 6). (B) S14 (E-box)-Luc contains six copies of the carbohydrate response element of S14 gene containing two E-boxes. Luciferase activity was normalized to the pSV- $\beta$ -gal values. Luciferase activity of CMV-7 was set to 1.0 (n = 6). Data are means  $\pm$  S.E. (C, D). Subcellular localization of full-length PDX-1 and  $\Delta$ HD-PDX-1 was revealed using the anti-PDX-1 antibody. CMV-PDX-1 (0.25  $\mu$ g) or CMV- $\Delta$ HD-PDX-1 (0.25  $\mu$ g) was transfected into HepG2 cells with CMV-GFP (0.25  $\mu$ g). Cells were cultured for 18 h, and localization of PDX-1 and  $\Delta$ HD-PDX-1 was detected by immunocytochemistry. GFP protein was located in the nucleus. Full-length PDX-1 is located in the nucleus in (C) and

$\Delta$ HDPDX-1 is located in the cytosol in (D).

#### **Supplementary Fig. 4**

##### **The effect of Ad-si-SREBP-1c in INS-1 cells.**

(A) INS-1 cells were infected with Ad-si-LacZ or Ad-si-SREBP-1c at 1 MOI in a 10 mM glucose medium for 48 h. After the medium was changed, 9cis-RA (1  $\mu$ M) and 22OH-Cho (1  $\mu$ M) were added and incubated for 24 h. Extracted mRNAs were quantified by real-time PCR (n = 3–6). Data are means  $\pm$  S.E. Relative rate to Ad-si-LacZ mRNA was set to 1.0. (B) INS-1 cells were infected with Ad-si-LacZ or Ad-si-SREBP-1c at 10 MOI in a 10 mM glucose medium for 48 h. After the medium was changed, 9cis-RA (10  $\mu$ M) and 22OH-Cho (10  $\mu$ M) were added and incubated for 24 h. Extracted proteins were immunoblotted with anti-SREBP-1, anti-PDX-1, and anti-Lamin B antibodies. The experiments in (B) were repeated twice with similar results.

#### **Supplementary Fig. 5**

##### **SET9 binds to both SREBP-1c and PDX-1.**

*In vitro* translated,  $^{35}$ S-methionine labeled SET9 was incubated with GST-PDX1 (full length (FL), 1–283),  $\Delta$ ABC-PDX-1 (76–283),  $\Delta$ HDPDX-1 (1–149), GST-SREBP-1c (bHLH, 286–364), and GST-SREBP-1c (nuclear form, 24–460) immobilized on glutathione sepharose beads. Bound proteins were resolved on 15 % gel by SDS-PAGE followed by autoradiography.

# Supplementary Fig.1

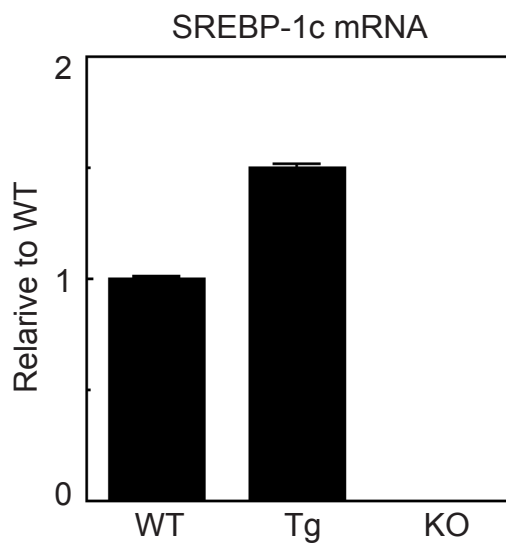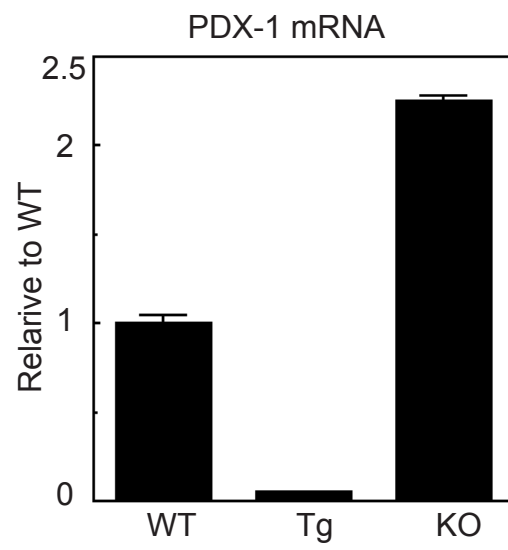

# Supplementary Fig.2

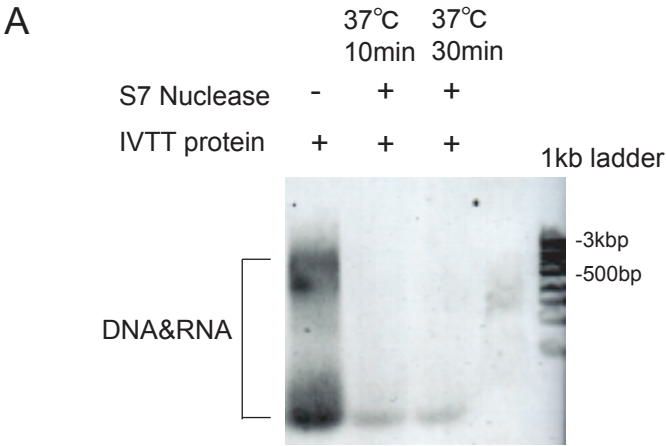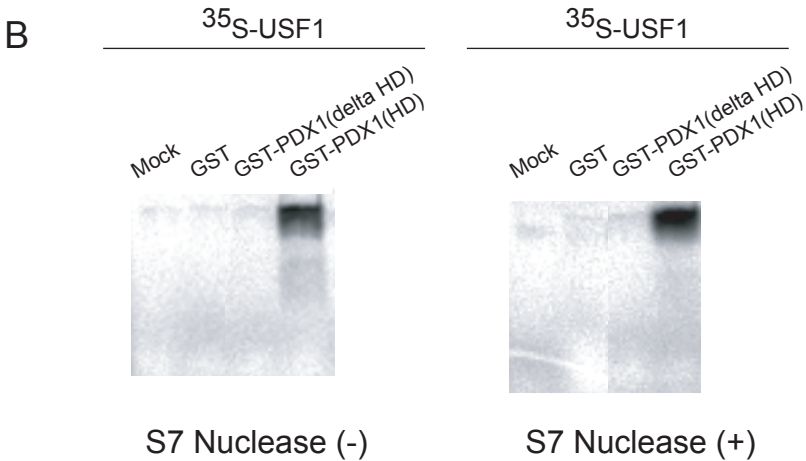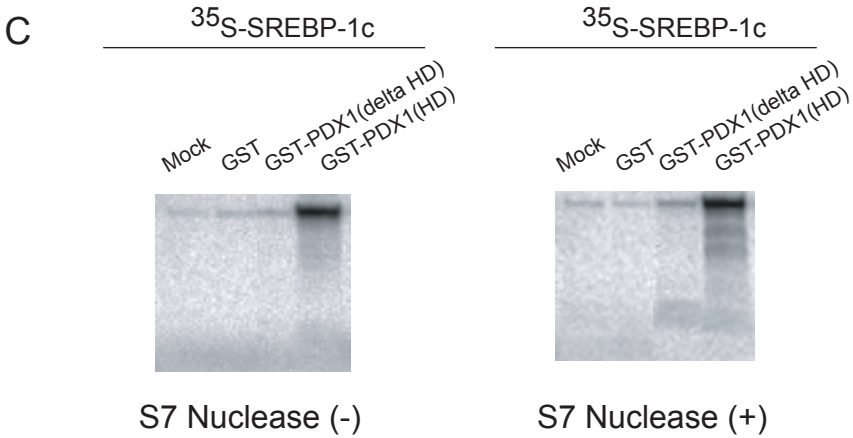

# Supplementary Fig.3

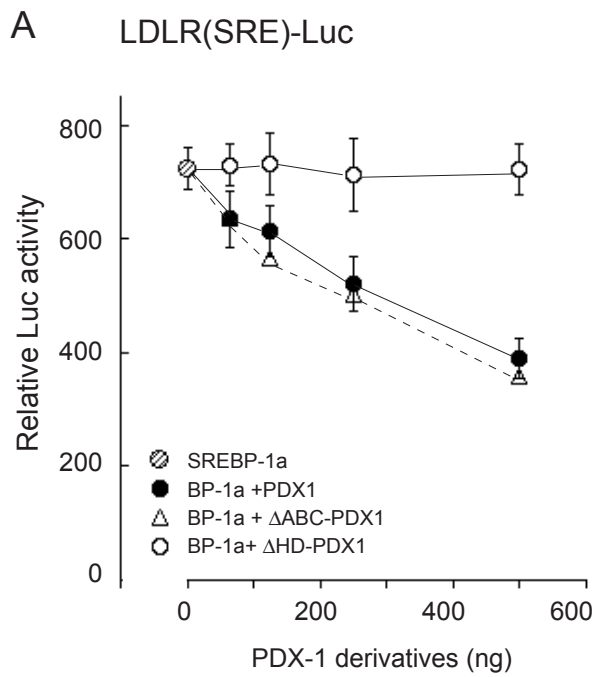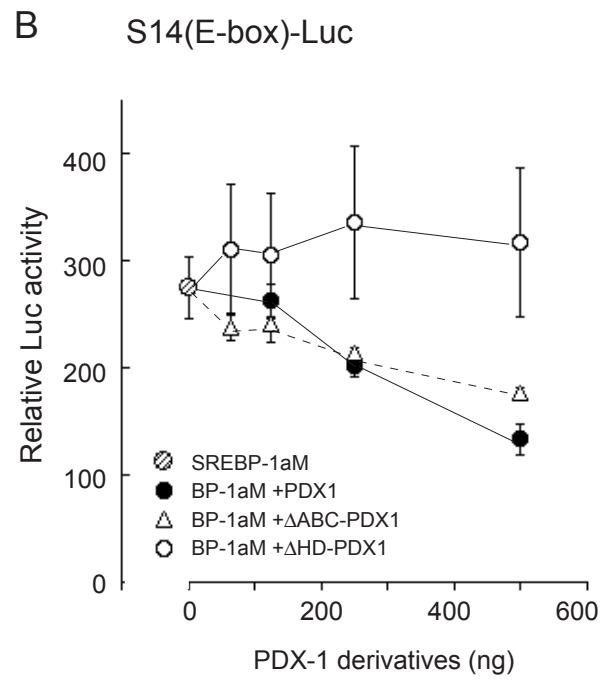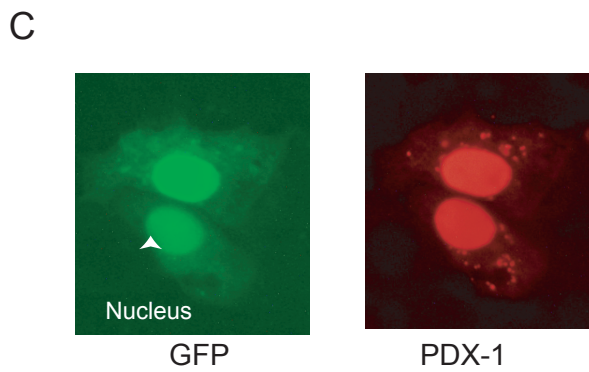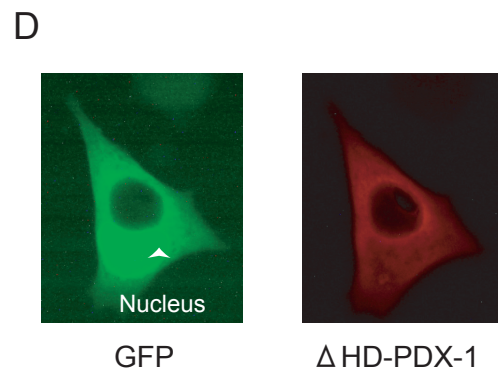

# Supplementary Fig.4

## A qPCR

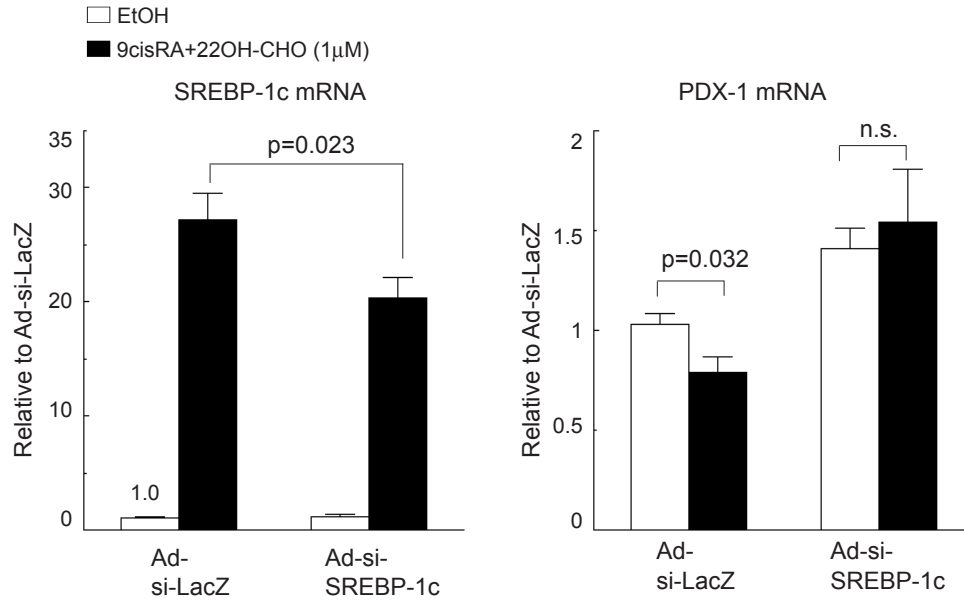

## B Western

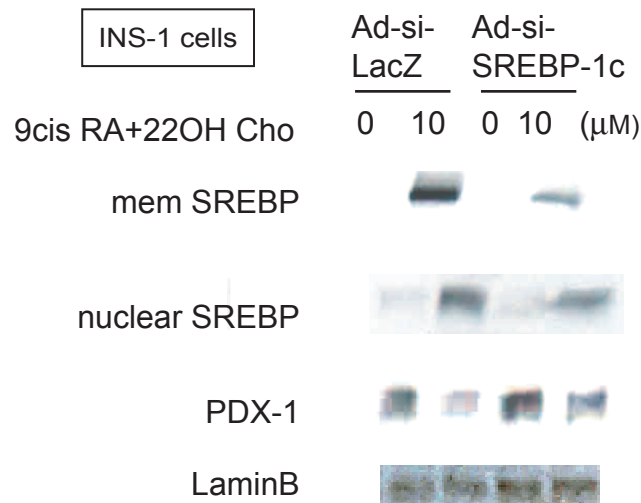

# Supplementary Fig.5

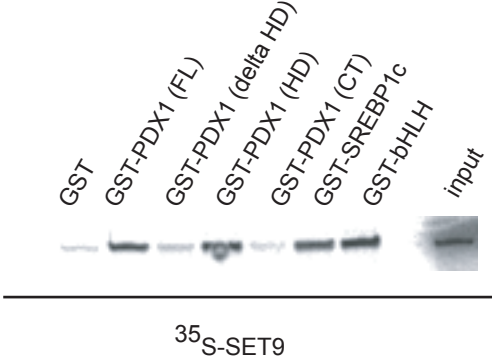

Supplement: supp_M110.186221_jbc.M110.186221-1.pdf [file supp_M110.186221_jbc.M110.186221-1.pdf]
